# Supplementary material for: Characteristics and outcomes of culture-negative prosthetic joint infections from the Prosthetic Joint Infection in Australia and New Zealand Observational (PIANO) cohort study
Source: Copernicus journal article supplement (doi:10.5194/jbji-7-203-2022), 2022-09-20
Supplement: Supplementary file 1 [file jbji-7-203-2022-supplement.pdf]

Supplement of J. Bone Joint Infect., 7, 203–211, 2022  
<https://doi.org/10.5194/jbji-7-203-2022-supplement>  
© Author(s) 2022. CC BY 4.0 License.

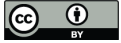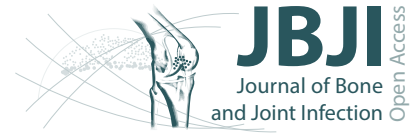

*Supplement of*

## **Characteristics and outcomes of culture-negative prosthetic joint infections from the Prosthetic Joint Infection in Australia and New Zealand Observational (PIANO) cohort study**

**Sarah Browning et al.**

*Correspondence to:* Sarah Browning ([sarah.browning@health.nsw.gov.au](mailto:sarah.browning@health.nsw.gov.au))

The copyright of individual parts of the supplement might differ from the article licence.

Supplementary

Table S1: Case details of 10 culture negative PJI cases not meeting EBJIS PJI criterion for ‘definitive’ or ‘likely’

| Patient No. | Age at diagnosis | Joint type | Indication | Infection category  | Clinical findings         | Diagnostic features and investigations |                         |                                      |                                                |                                                   |                                                           |                                       |                            |      | 24-month outcome |
|-------------|------------------|------------|------------|---------------------|---------------------------|----------------------------------------|-------------------------|--------------------------------------|------------------------------------------------|---------------------------------------------------|-----------------------------------------------------------|---------------------------------------|----------------------------|------|------------------|
|             |                  |            |            |                     |                           | Baseline CRP (mg/L)                    | Closed joint aspiration | Purulence surrounding the prosthesis | Intraoperative synovial fluid sent for culture | No. periprosthetic tissue specimens submitted for | No. periprosthetic specimens submitted for histopathology | Neutrophils PHPF & histology findings | 90-day Surgical management |      |                  |
| 1           | 53               | Hip        | Primary    | Early postoperative | Fever, local inflammation | -                                      | -                       | Yes                                  | -                                              | -                                                 | -                                                         | -                                     | -                          | DAIR | Successful       |
| 2           | 84               | Knee       | Primary    | Late acute          | Local inflammation        | 158                                    | -                       | Yes                                  | -                                              | 2                                                 | -                                                         | -                                     | -                          | DAIR | Unsuccessful     |
| 3           | 63               | Hip        | Primary    | Late acute          | Nil                       | 17                                     | -                       | Yes                                  | Yes                                            | -                                                 | -                                                         | -                                     | -                          | DAIR | Successful       |
| 4           | 85               | Knee       | Primary    | Chronic             | Local inflammation        | 180                                    | -                       | Yes                                  | Yes                                            | 6                                                 | -                                                         | -                                     | -                          | DAIR | Unsuccessful     |
| 5           | 72               | Shoulder   | Primary    | Late acute          | Fever, local inflammation | 236                                    | -                       | Yes                                  | Yes                                            | -                                                 | -                                                         | -                                     | -                          | DAIR | Successful       |

|    |    |          |                               |                     |                           |     |   |     |     |   |   |   |                                  |                       |            |
|----|----|----------|-------------------------------|---------------------|---------------------------|-----|---|-----|-----|---|---|---|----------------------------------|-----------------------|------------|
| 6  | 73 | Hip      | Primary                       | Unclassifiable      | Nil                       | -   | - | Yes | Yes | 4 | 6 | 4 | Benign fibrous connective tissue | One stage revision    | Successful |
| 7  | 75 | Knee     | Primary                       | Unclassifiable      | Local inflammation        | 116 | - | Yes | Yes | 4 | - | - |                                  | Two stage revision    | Successful |
| 8  | 75 | Hip      | Primary                       | Unclassifiable      | Fever, local inflammation | 89  | - | Yes | -   | 6 | - | - |                                  | DAIR                  | Successful |
| 9  | 70 | Knee     | Neither primary nor infective | Early postoperative | Fever, local inflammation | 133 | - | Yes | Yes | 1 | - | - |                                  | DAIR                  | Successful |
| 10 | 61 | Shoulder | Primary                       | Early postoperative | Local inflammation        | 300 | - | Yes | Yes | 5 | - | - |                                  | Excision arthroplasty | Successful |

Abbreviations: No., number; CRP, C-reactive protein; PHPF, per high powered field.

Table S2: Presenting features, diagnostic criterion, and outcomes of 16 late acute culture negative prosthetic joint infection managed with debridement, antibiotics, and implant retention

| Patient No. | Age, M/F | Joint | Any comorbidity | Clinical findings of fever, local inflammation, or sepsis | Baseline CRP (mg/L) | Closed joint aspiration | Synovial fluid WCC (cells/ $\mu$ l)<br><br>Synovial fluid neutrophil % | Purulence surrounding the prosthesis | Intraoperative synovial fluid sent for culture | No. periprosthetic tissue specimens submitted for culture | No. periprosthetic specimens submitted for histopathology | Histology findings | 24-month outcome |
|-------------|----------|-------|-----------------|-----------------------------------------------------------|---------------------|-------------------------|------------------------------------------------------------------------|--------------------------------------|------------------------------------------------|-----------------------------------------------------------|-----------------------------------------------------------|--------------------|------------------|
| 1           | 84, F    | Knee  | No              | Acute inflammation                                        | 158                 | -                       | -                                                                      | Yes                                  | -                                              | 2                                                         | 0                                                         | -                  | Unsuccessful     |
| 2           | 81, F    | Knee  | Yes             | Fever, acute inflammation                                 | 75                  | Yes                     | 90%                                                                    | -                                    | -                                              | 6                                                         | 0                                                         | -                  | Successful       |
| 3           | 82, F    | Knee  | Yes             | Fever, acute inflammation                                 | 19                  | Yes                     | 64000<br>85%                                                           | Yes                                  | Yes                                            | 2                                                         | 0                                                         | -                  | Successful       |
| 4           | 58, F    | Elbow | Yes             | Fever, acute inflammation                                 | 103                 | Yes                     | 100000<br>85%                                                          | Yes                                  | Yes                                            | 7                                                         | 0                                                         | -                  | Successful       |
| 5           | 61, F    | Knee  | Yes             | Acute inflammation                                        | 130                 | Yes                     | 130000<br>86%                                                          | Yes                                  | Yes                                            | 2                                                         | 0                                                         | -                  | Successful       |
| 6           | 65, F    | Knee  | No              | Fever, acute inflammation                                 | 367                 | Yes                     | 53500                                                                  | Yes                                  | Yes                                            | 3                                                         | 0                                                         | -                  | Successful       |

|    |          |          |     |                              |     |     |               |     |     |                   |   |                       |              |
|----|----------|----------|-----|------------------------------|-----|-----|---------------|-----|-----|-------------------|---|-----------------------|--------------|
| 7  | 63,<br>F | Hip      | Yes | Nil                          | 17  | -   | -             | Yes | Yes | Not<br>quantified | - | -                     | Successful   |
| 8  | 61,<br>F | Knee     | Yes | Acute<br>inflammation        | 130 | -   | -             | Yes | Yes | Not<br>quantified | - | -                     | Successful   |
| 9  | 82,<br>F | Knee     | Yes | Fever, acute<br>inflammation | 240 | Yes | 100%          | -   | Yes | 6                 | 0 | -                     | Successful   |
| 10 | 64,<br>M | Knee     | Yes | Fever, acute<br>inflammation | 140 | Yes | 26100<br>78%  | Yes | Yes | 5                 | 0 | -                     | Unsuccessful |
| 11 | 65,<br>F | Knee     | No  | Fever, acute<br>inflammation | 250 | Yes | 183000<br>84% | -   | Yes | 4                 | 0 | -                     | Successful   |
| 12 | 72,<br>F | Shoulder | Yes | Fever, acute<br>inflammation | 236 | -   | -             | Yes | Yes | Not<br>quantified | - | -                     | Successful   |
| 13 | 53,<br>F | Knee     | Yes | Fever, acute<br>inflammation | 23  | Yes | 31<br>97%     | Yes | Yes | 3                 | 0 | -                     | Unsuccessful |
| 14 | 58,<br>F | Knee     | Yes | Fever, acute<br>inflammation | 110 | -   | 1000<br>96%   | -   | Yes | 3                 | 1 | Acute<br>inflammation | Successful   |

|    |          |      |     |                       |     |     |               |   |     |                   |   |   |            |
|----|----------|------|-----|-----------------------|-----|-----|---------------|---|-----|-------------------|---|---|------------|
| 15 | 68,<br>F | Knee | Yes | Acute<br>inflammation | 190 | Yes | 154000<br>95% | - | Yes | 6                 | 0 | - | Successful |
| 16 | 83,<br>M | Hip  | No  | Acute<br>inflammation | 150 | -   | -             | - | Yes | Not<br>quantified | - | - | Successful |

Abbreviations: No., number; M, male; F, female; CRP, C-reactive protein; WCC, white cell count
